# Supplementary material for: MoS2/MWCNT-COOH-Modified Glassy Carbon Electrode for Nitrite Detection in Water Environment
Source: MDPI journal article supplement (doi:10.3390/chemosensors10100419), 2022-10-13
Supplement: s1 [file s1]

Supplementary

# MoS<sub>2</sub>/MWCNT-COOH-Modified Glassy Carbon Electrode for Nitrite Detection in Water Environment

Shijie Ren <sup>1,2</sup>, Yahui Zhang <sup>1</sup>, Ruimiao Qin <sup>1,2</sup>, Honggang Xu <sup>1</sup>, Minger Ye <sup>3,\*</sup> and Pengcheng Nie <sup>1,\*</sup>

<sup>1</sup> Institute of Information Technology in Agriculture, College of Biosystem Engineering and Food Science, Zhejiang University, Hangzhou 310000, China

<sup>2</sup> Institute of Agricultural Remote Sensing and Information Technology Application, College of Environmental and Resource Science, Zhejiang University, Hangzhou 310000, China

<sup>3</sup> College of Agriculture and Biotechnology, Zhejiang University, Hangzhou 310000, China

\* Correspondence: mingerye1189@163.com (M.Y.); pcn@zju.edu.cn (P.N.)

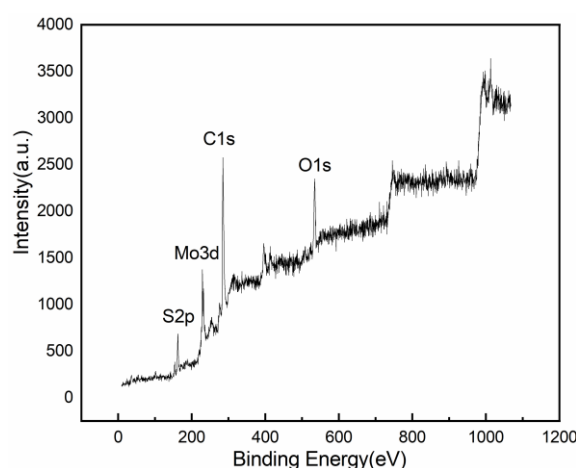

**Figure S1.** The full XPS spectrum of MoS<sub>2</sub>/MWCNT-COOH composites.

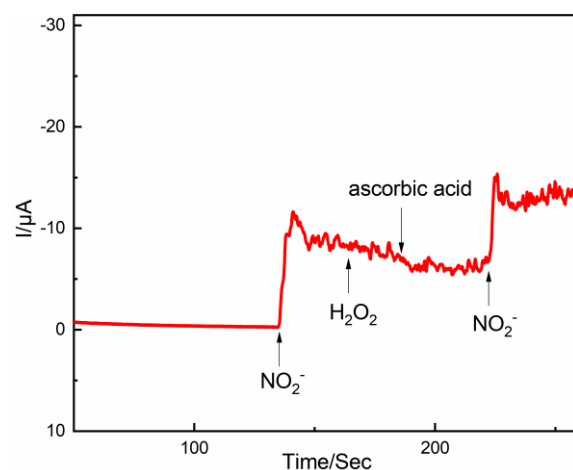

**Figure S2.** The i-t curves of MoS<sub>2</sub>/MWCNT-COOH/GCE in 0.1 M PBS added with nitrite (250 μM) and other interfering chemicals (hydrogen peroxide (H<sub>2</sub>O<sub>2</sub>) and ascorbic acid 500 μM respectively).

**Citation:** Ren, S.; Zhang, Y.; Qin, R.; Xu, H.; Ye, M.; Nie, P. MoS<sub>2</sub>/MWCNT-COOH-Modified Glassy Carbon Electrode for Nitrite Detection in Water Environment. *Chemosensors* **2022**, *10*, 419. <https://doi.org/10.3390/chemosensors10100419>

Academic Editor: Yige Zhou

Received: 12 September 2022

Accepted: 10 October 2022

Published: 13 October 2022

**Publisher's Note:** MDPI stays neutral with regard to jurisdictional claims in published maps and institutional affiliations.

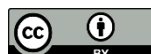

**Copyright:** © 2022 by the authors. Submitted for possible open access publication under the terms and conditions of the Creative Commons Attribution (CC BY) license (<https://creativecommons.org/licenses/by/4.0/>).

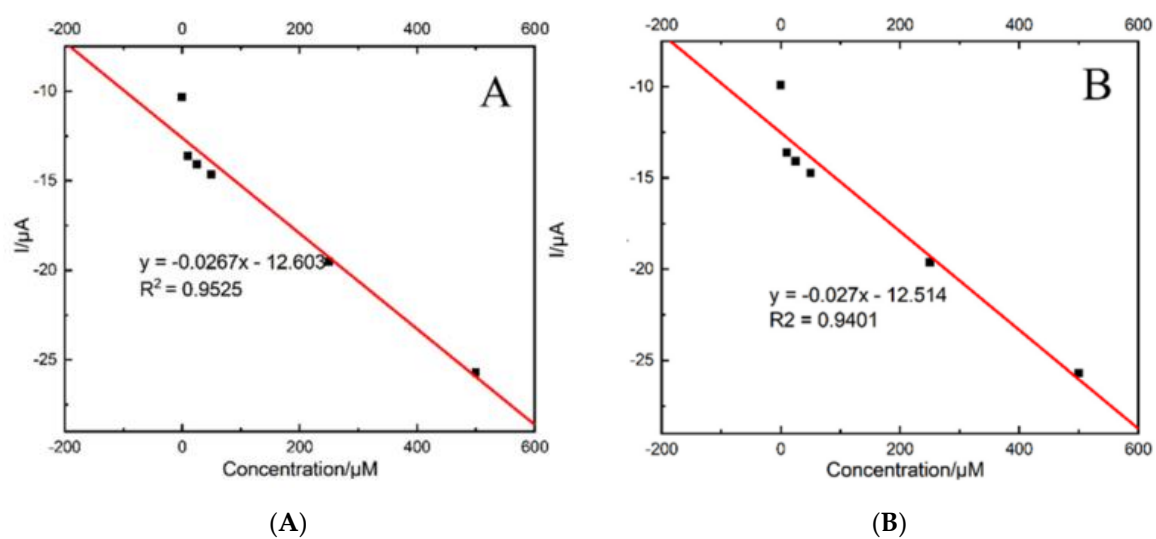

**Figure S3.** (A) The standard addition calibration curves of tap water, (B) The standard addition calibration curves of river water.
